# Supplementary material for: Intensive Perinatal Mental Health Programs in the United States: A Call to Action
Source: Atypon-hosted journal article supplement (doi:10.1176/appi.ps.202100384), 2022-01-26
Supplement: appi.ps.202100384.ds001.pdf [file appi.ps.202100384.ds001.pdf]

Table 1. Program & Patient Characteristics, *N*=15 (as reported by program directors or designees)

| Variable                                                                                                                                                              | <i>N</i> (%) unless otherwise noted |
|-----------------------------------------------------------------------------------------------------------------------------------------------------------------------|-------------------------------------|
| <b>Program Characteristics</b>                                                                                                                                        |                                     |
| Type of program                                                                                                                                                       |                                     |
| Outpatient (IOP, PHP) <sup>a</sup>                                                                                                                                    | 13 (87)                             |
| Inpatient (has outpatient services too)                                                                                                                               | 2 (13)                              |
| Primary Setting                                                                                                                                                       |                                     |
| Hospital                                                                                                                                                              | 4 (27)                              |
| University                                                                                                                                                            | 2 (13)                              |
| Outpatient                                                                                                                                                            | 6 (40)                              |
| Hospital + University                                                                                                                                                 | 1 (7)                               |
| Hospital + Outpatient                                                                                                                                                 | 1 (7)                               |
| Hospital + Outpatient +University                                                                                                                                     | 1 (7)                               |
| Referral Sources                                                                                                                                                      |                                     |
| Private practice                                                                                                                                                      | 14 (93)                             |
| Hospital                                                                                                                                                              | 13 (87)                             |
| Self (e.g., internet search, social media)                                                                                                                            | 13 (87)                             |
| Outpatient Clinic                                                                                                                                                     | 12 (80)                             |
| University                                                                                                                                                            | 2 (13)                              |
| Other (doula, community group, midwives, Postpartum Support International [PSI], inpatient unit, visiting nurse associations, Women Infants & Children program [WIC]) | 9 (60)                              |
| Years in operation                                                                                                                                                    |                                     |
| 1-3                                                                                                                                                                   | 11 (73)                             |
| 6-10                                                                                                                                                                  | 3 (20)                              |
| 18                                                                                                                                                                    | 1 (7)                               |
| Estimated total number of women enrolled across all programs                                                                                                          | 8,879 (range 10 - 5,000)            |
| Program leadership (some indicated multiple leaders <sup>b</sup> )                                                                                                    |                                     |
| Psychiatrist                                                                                                                                                          | 10 (67)                             |
| Social worker                                                                                                                                                         | 6 (40)                              |
| Psychologist                                                                                                                                                          | 5 (33)                              |
| RN                                                                                                                                                                    | 4 (27)                              |
| CRNP/APRN                                                                                                                                                             | 2 (13)                              |
| Provider intake (some indicated multiple intake providers <sup>b</sup> )                                                                                              |                                     |
| Psychiatrist                                                                                                                                                          | 10 (67)                             |
| Social Worker                                                                                                                                                         | 8 (53)                              |
| Psychologist                                                                                                                                                          | 6 (40)                              |
| CRNP                                                                                                                                                                  | 3 (20)                              |
| LMFT                                                                                                                                                                  | 3 (20)                              |
| RN                                                                                                                                                                    | 3 (20)                              |
| LPC                                                                                                                                                                   | 1 (7)                               |
| OT                                                                                                                                                                    | 1 (7)                               |

|                                                                                                                               |                 |
|-------------------------------------------------------------------------------------------------------------------------------|-----------------|
| Team care coordination meetings                                                                                               | 13 (87)         |
| # women attend per week <sup>c</sup>                                                                                          |                 |
| 1-5                                                                                                                           | 6 (40)          |
| 6-10                                                                                                                          | 5 (33)          |
| >10                                                                                                                           | 3 (20)          |
| #days attended per week <sup>c</sup>                                                                                          |                 |
| 2-4                                                                                                                           | 8 (53)          |
| 5-7                                                                                                                           | 6 (40)          |
| # hours attended per day <sup>c</sup>                                                                                         |                 |
| 2-4                                                                                                                           | 6 (40)          |
| 5-9                                                                                                                           | 6 (40)          |
| Mean number of women in program at one time                                                                                   | 12 (range 5-22) |
| Mean Length of Stay (days)                                                                                                    | 18 (range 7-35) |
| Treat pregnant women                                                                                                          | 9 (60)          |
| Treat women with infertility/pregnancy loss                                                                                   | 4 (27)          |
| Barriers to attendance                                                                                                        |                 |
| Transportation                                                                                                                | 5 (33)          |
| Work conflict                                                                                                                 | 5 (33)          |
| Childcare                                                                                                                     | 4 (27)          |
| Program location                                                                                                              | 4 (27)          |
| Health insurance                                                                                                              | 3 (20)          |
| Symptom severity                                                                                                              | 2 (13)          |
| Schedule conflict                                                                                                             | 2 (13)          |
| Group therapy conflict                                                                                                        | 2 (13)          |
| Poor match                                                                                                                    | 2 (13)          |
| Psychosocial stressors                                                                                                        | 1 (7)           |
| Moved                                                                                                                         | 1 (7)           |
| Other (reason not specified)                                                                                                  | 1 (7)           |
| Types of therapies provided (some listed several therapies)                                                                   |                 |
| CBT                                                                                                                           | 14 (93)         |
| Medication                                                                                                                    | 14 (93)         |
| Psychoeducation                                                                                                               | 14 (93)         |
| Parent infant Attachment                                                                                                      | 13 (87)         |
| IPT                                                                                                                           | 8 (53)          |
| DBT                                                                                                                           | 8 (53)          |
| Mindfulness                                                                                                                   | 6 (40)          |
| Infant massage                                                                                                                | 5 (33)          |
| ACT                                                                                                                           | 5 (33)          |
| Art therapy                                                                                                                   | 3 (20)          |
| Yoga                                                                                                                          | 3 (20)          |
| Behavioral activation                                                                                                         | 2 (13)          |
| Trauma therapy                                                                                                                | 2 (13)          |
| Other (expressive therapy, exposure and response prevention, spirituality, Child Life Therapy, Psychodynamic, process groups, | 8 (53)          |

|                                                                                                         |                  |
|---------------------------------------------------------------------------------------------------------|------------------|
| reflective parenting, skill building, exercise, supportive, occupational, shame resiliency, relational) |                  |
| Infant developmental assessment                                                                         | 3 (20)           |
| Therapy format                                                                                          |                  |
| Individual                                                                                              | 13 (87)          |
| Group                                                                                                   | 13 (87)          |
| Mother-infant                                                                                           | 11(73)           |
| Family                                                                                                  | 11 (73)          |
| Couples                                                                                                 | 9 (60)           |
| Other (e.g., multifamily)                                                                               | 1(7)             |
| Infant babysitting provided                                                                             | 5 (33)           |
| Babysitting older children                                                                              | 0                |
| Patient navigator                                                                                       | 4 (27)           |
| <b>Characteristics of women served</b>                                                                  |                  |
| Average maternal age (mean years)                                                                       | 31 (range 16-46) |
| Employment status (mean %)                                                                              |                  |
| Full time                                                                                               | 68% (0-80%)      |
| Part time                                                                                               | 16%              |
| Unemployed                                                                                              | 25%              |
| Marital Status (mean %)                                                                                 |                  |
| Single                                                                                                  | 17% (0-30%)      |
| Married                                                                                                 | 69% (40-90%)     |
| Partnered                                                                                               | 18% (0-90%)      |
| Separated/Divorced                                                                                      | 6% (0-20%)       |
| Race/Ethnicity (mean %)                                                                                 |                  |
| African American/ Black                                                                                 | 18% (0-55%)      |
| Asian                                                                                                   | 10% 1-25%)       |
| Hispanic                                                                                                | 17% (2-50%)      |
| White                                                                                                   | 57% (20-82%)     |
| Native American                                                                                         | <1% (0-2%)       |
| Pacific Islander                                                                                        | <1% (2-5%)       |
| Other                                                                                                   | 1% (2-11%)       |
| Insurance/payment type (mean %)                                                                         |                  |
| Commercial                                                                                              | 65% (0-100%)     |
| Medicaid                                                                                                | 17% (0-53%)      |
| Sliding scale                                                                                           | 2.5% (0-30%)     |
| Self-pay                                                                                                | <1% (0-5%)       |
| MediCal                                                                                                 | 0%               |
| Maternal Diagnoses (mean %, includes co-morbidities)                                                    |                  |
| Postpartum Depression                                                                                   | 22% (0-100%)     |
| Major Depression                                                                                        | 37% (0-80%)      |
| Generalize Anxiety Disorder                                                                             | 28% (0-80%)      |
| Obsessive Compulsive Disorder                                                                           | 8% (0-40%)       |
| Panic disorder                                                                                          | 10% (0-60%)      |
| Post-Traumatic Stress Disorder                                                                          | 7% (0-30%)       |

|                 |              |
|-----------------|--------------|
| Bipolar I       | 6% (0-25%)   |
| Bipolar II      | 5% (0-20%)   |
| Psychosis       | 2% (0-5%)    |
| Schizophrenia   | 1% (0-10%)   |
| Substance use   | <1%          |
| Borderline      | <1%          |
| Primipara (yes) | 61% (25-90%) |

---

<sup>a</sup>IOP: Intensive outpatient program; PHP = partial hospital program

<sup>b</sup>Certified registered nurse practitioner = CRNP, Licensed Marriage & Family Therapist = LMFT, Registered Nurse = RN, Licensed Professional Counselor = LPC, Occupational Therapist = OT

<sup>c</sup>Percentage reported out of total number of programs that answered the question
